# Supplementary material for: Prevalence of polycystic ovary syndrome in patients with type 2 diabetes: A systematic review and meta-analysis
Source: PubMed Central journal article supplement (PMC9471325; doi:10.3389/fendo.2022.980405), 2022-08-31
Supplement: DataSheet_1.pdf [file DataSheet_1.pdf]

# *Supplementary Material*

## **1 SUPPLEMENTARY DATA**

### **1.1 SUPPLEMENTARY MATERIAL 1: SEARCH STRATEGY**

eTable 1. Search Strategy: PubMed

eTable 2. Search Strategy: Embase

eTable 3. Search Strategy: Cochrane Library

eTable 4. Search Strategy: Web of Science

### **1.2 SUPPLEMENTARY MATERIAL 2**

eTable 5. Agency for healthcare research and quality (AHRQ) checklist (cross-sectional) for studies

### **1.3 SUPPLEMENTARY MATERIAL 3**

eTable 6. Risk of Bias of Included Studies



**eTable 2. Search Strategy: Embase**

|    |                                                                                                                                                                                                                     |
|----|---------------------------------------------------------------------------------------------------------------------------------------------------------------------------------------------------------------------|
| 1  | 'non insulin dependent diabetes mellitus'/exp                                                                                                                                                                       |
| 2  | 'diabetes mellitus, noninsulin-dependent':ab,ti                                                                                                                                                                     |
| 3  | 'diabetes mellitus, ketosis-resistant':ab,ti                                                                                                                                                                        |
| 4  | 'diabetes mellitus, ketosis resistant':ab,ti                                                                                                                                                                        |
| 5  | 'ketosis-resistant diabetes mellitus':ab,ti                                                                                                                                                                         |
| 6  | 'diabetes mellitus, non insulin dependent':ab,ti                                                                                                                                                                    |
| 7  | 'diabetes mellitus, non-insulin-dependent':ab,ti                                                                                                                                                                    |
| 8  | 'non-insulin-dependent diabetes mellitus':ab,ti                                                                                                                                                                     |
| 9  | 'diabetes mellitus, stable':ab,ti                                                                                                                                                                                   |
| 10 | 'stable diabetes mellitus':ab,ti                                                                                                                                                                                    |
| 11 | 'diabetes mellitus, type ii':ab,ti                                                                                                                                                                                  |
| 12 | 'niddm':ab,ti                                                                                                                                                                                                       |
| 13 | 'diabetes mellitus, noninsulin dependent':ab,ti                                                                                                                                                                     |
| 14 | 'diabetes mellitus, maturity-onset':ab,ti                                                                                                                                                                           |
| 15 | 'diabetes mellitus, maturity onset':ab,ti                                                                                                                                                                           |
| 16 | 'maturity-onset diabetes mellitus':ab,ti                                                                                                                                                                            |
| 17 | 'maturity onset diabetes mellitus':ab,ti                                                                                                                                                                            |
| 18 | 'mody':ab,ti                                                                                                                                                                                                        |
| 19 | 'diabetes mellitus, slow-onset':ab,ti                                                                                                                                                                               |
| 20 | 'diabetes mellitus, slow onset':ab,ti                                                                                                                                                                               |
| 21 | 'slow-onset diabetes mellitus':ab,ti                                                                                                                                                                                |
| 22 | type 2 diabetes mellitus':ab,ti                                                                                                                                                                                     |
| 23 | 'noninsulin-dependent diabetes mellitus':ab,ti                                                                                                                                                                      |
| 24 | .'noninsulin dependent diabetes mellitus':ab,ti                                                                                                                                                                     |
| 25 | 'maturity-onset diabetes':ab,ti                                                                                                                                                                                     |
| 26 | diabetes, maturity-onset':ab,ti                                                                                                                                                                                     |
| 27 | 'maturity onset diabetes':ab,ti                                                                                                                                                                                     |
| 28 | type 2 diabetes':ab,ti                                                                                                                                                                                              |
| 29 | 'diabetes, type 2':ab,ti                                                                                                                                                                                            |
| 30 | diabetes mellitus, adult-onset':ab,ti                                                                                                                                                                               |
| 31 | 'adult-onset diabetes mellitus':ab,ti                                                                                                                                                                               |
| 32 | 'diabetes mellitus, adult onset':ab,ti                                                                                                                                                                              |
| 33 | #1 OR #2 OR #3 OR #4 OR #5 OR #6 OR #7 OR #8 OR #9 OR #10 OR #11 OR #12 OR #13 OR #14 OR #15 OR #16 OR #17 OR #18 OR #19 OR #20 OR #21 OR #22 OR #23 OR #24 OR #25 OR #26 OR #27 OR #28 OR #29 OR #30 OR #31 OR #32 |

|    |                                                                                                   |
|----|---------------------------------------------------------------------------------------------------|
| 34 | ovary polycystic disease'/exp                                                                     |
| 35 | 'ovary syndrome, polycystic':ab,ti                                                                |
| 36 | 'stein-leventhal syndrome':ab,ti                                                                  |
| 37 | 'stein leventhal syndrome':ab,ti                                                                  |
| 38 | 'syndrome, stein-leventhal':ab,ti                                                                 |
| 39 | 'sclerocystic ovarian degeneration':ab,ti                                                         |
| 40 | 'ovarian degeneration, sclerocystic':ab,ti                                                        |
| 41 | 'sclerocystic ovary syndrome':ab,ti                                                               |
| 42 | polycystic ovarian syndrome':ab,ti                                                                |
| 43 | 'ovarian syndrome, polycystic':ab,ti                                                              |
| 44 | polycystic ovary syndrome 1':ab,ti                                                                |
| 45 | 'sclerocystic ovaries':ab,ti                                                                      |
| 46 | 'ovary, sclerocystic':ab,ti                                                                       |
| 47 | 'sclerocystic ovary':ab,ti                                                                        |
| 48 | #34 OR #35 OR #36 OR #37 OR #38 OR #39 OR #40 OR #41 OR #42 OR #43 OR<br>#44 OR #45 OR #46 OR #47 |
| 49 | #33 AND #48                                                                                       |

**eTable 3. Search Strategy: Cochrane Library**

|    |                                                                                                                                                                                                                                                                   |
|----|-------------------------------------------------------------------------------------------------------------------------------------------------------------------------------------------------------------------------------------------------------------------|
| 1  | MeSH descriptor: [Diabetes Mellitus, Type 2] explode all trees                                                                                                                                                                                                    |
| 2  | (Diabetes Mellitus, Noninsulin-Dependent):ti,ab,kw OR (Diabetes Mellitus, Ketosis-Resistant):ti,ab,kw OR (Diabetes Mellitus, Ketosis Resistant):ti,ab,kw OR (Ketosis-Resistant Diabetes Mellitus):ti,ab,kw OR (Diabetes Mellitus, Non Insulin Dependent):ti,ab,kw |
| 3  | (Diabetes Mellitus, Non-Insulin-Dependent):ti,ab,kw OR (Non-Insulin-Dependent Diabetes Mellitus):ti,ab,kw OR (Diabetes Mellitus, Stable):ti,ab,kw OR (Stable Diabetes Mellitus):ti,ab,kw OR (Diabetes Mellitus, Type II):ti,ab,kw                                 |
| 4  | (NIDDM):ti,ab,kw OR (Diabetes Mellitus, Noninsulin Dependent):ti,ab,kw OR (Diabetes Mellitus, Maturity-Onset):ti,ab,kw OR (Diabetes Mellitus, Maturity Onset):ti,ab,kw OR (Maturity-Onset Diabetes Mellitus):ti,ab,kw                                             |
| 5  | (Maturity Onset Diabetes Mellitus):ti,ab,kw OR (MODY):ti,ab,kw OR (Diabetes Mellitus, Slow-Onset):ti,ab,kw OR (Diabetes Mellitus, Slow Onset):ti,ab,kw OR (Slow-Onset Diabetes Mellitus):ti,ab,kw                                                                 |
| 6  | (Type 2 Diabetes Mellitus):ti,ab,kw OR (Noninsulin-Dependent Diabetes Mellitus):ti,ab,kw OR (Noninsulin Dependent Diabetes Mellitus):ti,ab,kw OR (Maturity-Onset Diabetes):ti,ab,kw OR (Diabetes, Maturity-Onset):ti,ab,kw                                        |
| 7  | (Maturity Onset Diabetes):ti,ab,kw OR (Type 2 Diabetes):ti,ab,kw OR (Diabetes, Type 2):ti,ab,kw OR (Diabetes Mellitus, Adult-Onset):ti,ab,kw OR (Adult-Onset Diabetes Mellitus):ti,ab,kw                                                                          |
| 8  | (Diabetes Mellitus, Adult Onset):ti,ab,kw                                                                                                                                                                                                                         |
| 9  | #1 OR #2 OR #3 OR #4 OR #5 OR #6 OR #7 OR #8                                                                                                                                                                                                                      |
| 10 | MeSH descriptor: [Polycystic Ovary Syndrome] explode all trees                                                                                                                                                                                                    |
| 11 | (Ovary Syndrome, Polycystic):ti,ab,kw OR (Syndrome, Polycystic Ovary):ti,ab,kw OR (Stein-Leventhal Syndrome):ti,ab,kw OR (Stein Leventhal Syndrome):ti,ab,kw OR (Syndrome, Stein-Leventhal):ti,ab,kw                                                              |
| 12 | (Sclerocystic Ovarian Degeneration):ti,ab,kw OR (Ovarian Degeneration, Sclerocystic):ti,ab,kw OR (Sclerocystic Ovary Syndrome):ti,ab,kw OR (Polycystic Ovarian Syndrome):ti,ab,kw OR (Ovarian Syndrome, Polycystic):ti,ab,kw                                      |
| 13 | (Polycystic Ovary Syndrome 1):ti,ab,kw OR (Sclerocystic Ovaries):ti,ab,kw OR (Ovary, Sclerocystic):ti,ab,kw OR (Sclerocystic Ovary):ti,ab,kw                                                                                                                      |
| 14 | #10 OR #11 OR #12 OR #13                                                                                                                                                                                                                                          |
| 15 | #9 AND #14                                                                                                                                                                                                                                                        |



## 1.2 SUPPLEMENTARY MATERIAL 2

**eTable 5. Agency for healthcare research and quality (AHRQ) checklist (cross-sectional) for studies**

| Study              | Items scored |   |   |   |   |   |   |   |   |    |    | Total score | Quality  |
|--------------------|--------------|---|---|---|---|---|---|---|---|----|----|-------------|----------|
|                    | 1            | 2 | 3 | 4 | 5 | 6 | 7 | 8 | 9 | 10 | 11 |             |          |
| Amed2011           | 1            | 0 | 0 | 1 | 0 | 1 | 0 | 1 | 0 | 1  | 0  | 5           | Moderate |
| Amed2012           | 1            | 0 | 0 | 1 | 1 | 1 | 0 | 0 | 0 | 1  | 0  | 5           | Moderate |
| Amini2008          | 1            | 1 | 0 | 1 | 1 | 0 | 1 | 1 | 0 | 0  | 0  | 6           | Moderate |
| Amutha2012         | 1            | 0 | 0 | 1 | 0 | 0 | 0 | 0 | 0 | 0  | 0  | 2           | Low      |
| Balasanthiran2011* | 1            | 0 | 0 | 0 | 0 | 0 | 0 | 0 | 0 | 0  | 0  | 1           | Low      |
| Kelestimur2006     | 1            | 1 | 0 | 0 | 1 | 0 | 1 | 1 | 1 | 1  | 0  | 7           | Moderate |
| Mirzaei2008        | 1            | 1 | 0 | 1 | 1 | 0 | 0 | 1 | 0 | 0  | 0  | 5           | Moderate |
| Sim2016            | 1            | 1 | 0 | 1 | 1 | 1 | 1 | 1 | 0 | 1  | 0  | 8           | High     |
| Zargar2005         | 1            | 1 | 0 | 1 | 1 | 1 | 0 | 0 | 0 | 0  | 0  | 5           | Moderate |
| Peppard2001        | 1            | 1 | 0 | 1 | 1 | 0 | 1 | 1 | 1 | 1  | 0  | 8           | High     |
| Zdravkovic2004     | 1            | 0 | 0 | 1 | 1 | 0 | 0 | 0 | 0 | 0  | 0  | 3           | Low      |
| Ramachandran2003   | 1            | 1 | 0 | 1 | 0 | 0 | 0 | 0 | 0 | 0  | 0  | 3           | Low      |
| Shield2009         | 1            | 0 | 0 | 1 | 1 | 1 | 1 | 0 | 0 | 1  | 1  | 7           | Moderate |
| Wilmot2010*        | 1            | 0 | 0 | 0 | 0 | 0 | 0 | 0 | 0 | 0  | 0  | 1           | Low      |

Footnote:\*=Conference paper; 0: no, 1: yes, overall risk of bias: low (score >8), moderate (score 6-8), or high (score ≤5). Items scored: 1) Define the source of information (survey, record review); 2) List inclusion and exclusion criteria for exposed and unexposed subjects (cases and controls) or refer to previous publications; 3) Indicate time period used for identifying patients; 4) Indicate whether or not subjects were consecutive if not population-based; 5) Indicate if evaluators of subjective components of study were masked to other aspects of the status of the participants; 6) Describe any assessments undertaken for quality assurance purposes (e.g., test/retest of primary outcome measurements); 7) Explain any patient exclusions from analysis; 8) Describe how confounding was assessed and/or controlled; 9) If applicable, explain how missing data were handled in the analysis; 10) Summarize patient response rates and completeness of data collection; 11) Clarify what follow-up, if any, was expected and the percentage of patients for which incomplete data or follow-up was obtained.

### 1.3 SUPPLEMENTARY MATERIAL 3

**eTable 6. Risk of Bias of Included Studies**

| Study              | External Validity Items |   |   |   |   | Internal Validity Items |   |   |   |    | Overall Score | Overall Risk of Bias |
|--------------------|-------------------------|---|---|---|---|-------------------------|---|---|---|----|---------------|----------------------|
|                    | 1                       | 2 | 3 | 4 | 5 | 6                       | 7 | 8 | 9 | 10 |               |                      |
| Amed2011           | 1                       | 0 | 0 | 1 | 1 | 0                       | 0 | 1 | 1 | 1  | 6             | Moderate             |
| Amed2012           | 1                       | 0 | 0 | 1 | 1 | 0                       | 0 | 1 | 1 | 1  | 6             | Moderate             |
| Amini2008          | 0                       | 1 | 1 | 1 | 1 | 0                       | 0 | 1 | 1 | 1  | 7             | Moderate             |
| Amutha2012         | 0                       | 0 | 1 | 1 | 1 | 0                       | 0 | 1 | 1 | 1  | 6             | Moderate             |
| Balasanthiran2011* | 0                       | 0 | 0 | 0 | 1 | 0                       | 0 | 1 | 0 | 0  | 2             | High                 |
| Kelestimur2006     | 0                       | 0 | 0 | 0 | 1 | 0                       | 0 | 1 | 1 | 1  | 4             | High                 |
| Mirzaei2008        | 0                       | 0 | 0 | 0 | 1 | 1                       | 1 | 1 | 1 | 1  | 6             | Moderate             |
| Sim2016            | 0                       | 0 | 0 | 0 | 1 | 1                       | 1 | 1 | 1 | 1  | 6             | Moderate             |
| Zargar2005         | 0                       | 0 | 0 | 0 | 1 | 1                       | 0 | 1 | 1 | 1  | 5             | High                 |
| Peppard2001        | 0                       | 1 | 1 | 1 | 1 | 1                       | 0 | 1 | 1 | 1  | 8             | Moderate             |
| Zdravkovic2004     | 0                       | 1 | 1 | 1 | 1 | 1                       | 1 | 1 | 1 | 1  | 9             | Low                  |
| Ramachandran2003   | 0                       | 0 | 0 | 0 | 1 | 0                       | 0 | 0 | 1 | 1  | 3             | High                 |
| Shield2009         | 1                       | 1 | 1 | 1 | 1 | 0                       | 1 | 1 | 1 | 1  | 9             | Low                  |
| Wilmot2010*        | 0                       | 0 | 0 | 0 | 1 | 0                       | 0 | 0 | 1 | 1  | 3             | High                 |

Footnote: \* = Conference paper; 0: no, 1: yes, overall risk of bias: low (score > 8), moderate (score 6 - 8), or high (score ≤ 5). Items scored: 1) Was the study's target population a close representation of the national population in relation to relevant variables, e.g., age, sex?; 2) Was the sampling frame a true or close representation of the target population?; 3) Was some form of random selection used to select the sample, OR, was a census undertaken?; 4) Was the likelihood of non-response bias minimal?; 5) Were data collected directly from the subjects (as opposed to a proxy)?; 6) Was an acceptable case definition used in the study?; 7) Had the study instrument that measured the parameter of interest (e.g., prevalence of comorbidity) been tested for reliability and validity (if necessary)?; 8) Was the same mode of data collection used for all subjects?; 9) Was the length of the shortest prevalence period for the parameter of interest appropriate?; 10) Were the numerator(s) and denominator(s) for the parameter of interest appropriate?
